# Supplementary material for: Three-dimensional assessment of finger individuation reveals finger- and joint-specific selective motor control deficits in pediatric cerebral palsy
Source: Research Square preprint supplement (doi:10.21203/rs.3.rs-6896151/v1), 2025-06-25
Supplement: Supplementary file 1 [file 65da4204fea0b7c5415aab03.docx]

**Supplement 1: Technical specifications of the HAND apparatus**

The HAND (JHU reference #C14603) consisted of custom-developed force sensors placed underneath each fingertip ‘cup’. Each force sensor comprised highly sensitive strain gauges capable of detecting 3-dimensional micro-isometric forces at the fingertips in the milliNewton range (1). Force data were digitized by a custom data acquisition board and sampled at 1 KHz per strain gauge-pair comparison. Digitized data were streamed, scaled and projected onto a computer screen with a virtual 3-dimensional space for real-time feedback during the task, with a scaling factor of 0.6 cm/N, 0.4 cm/N, and 0.8 cm/N in the x-, y-, and z-directions, respectively. Behavioral tasks were programmed using custom scripts developed in Python (2).

**References**

1. Carducci J, Olds K, Krakauer JW, Xu J, Brown JD. Novel Planar Strain Sensor Design for Capturing 3-Dimensional Fingertip Forces from Patients Affected by Hand Paralysis. Sensors (Basel). 2022;22(19):7441.

2. Van Rossum G, Drake FL. The Python Language Reference Manual: For Python Version 3.2: Network Theory Limited; 2011.
